# Supplementary material for: Photovoltaic stimulation of mouse and pig retina with pyrolytic carbon microelectrodes integrated on high-density silicon solar cell arrays
Source: Research Square preprint supplement (doi:10.21203/rs.3.rs-7829870/v1), 2025-10-27
Supplement: Supplementary file 1 [file 72852b78393e98ac49f18a9f.pdf]

# Photovoltaic stimulation of mouse and pig retina with pyrolytic carbon microelectrodes integrated on high-density silicon solar cell arrays

Akihiro Matsumoto<sup>1\*</sup>, Pratik Kusumanchi<sup>2\*</sup>, Jesper Guldsmid Madsen<sup>3\*</sup>, Asbjørn Cortnum Jørgensen<sup>4</sup>, Gisele A.d.R. Benatto<sup>5</sup>, Sune Thorsteinsson<sup>5</sup>, Peter B. Poulsen<sup>5</sup>, Keisuke Yonehara<sup>1</sup>, Toke Bek<sup>3</sup>, Stephan Sylvest Keller<sup>2</sup>, Rasmus Schmidt Davidsen<sup>4†</sup>

<sup>1</sup> Department of Gene Function and Phenomics, National Institute of Genetics, Mishima, Japan

<sup>2</sup> National Centre for Nano Fabrication and Characterization (DTU Nanolab), Technical University of Denmark

<sup>3</sup> Department of Ophthalmology, Aarhus University Hospital

<sup>4</sup> Department of Electrical & Computer Engineering, Aarhus University

<sup>5</sup> Department of Electrical and Photonics Engineering, Technical University of Denmark

\*Are to be considered joint first authors, †Corresponding Author: rasda@ece.au.dk

## Supplementary information

### Photovoltaic test pixel with Au contacts.

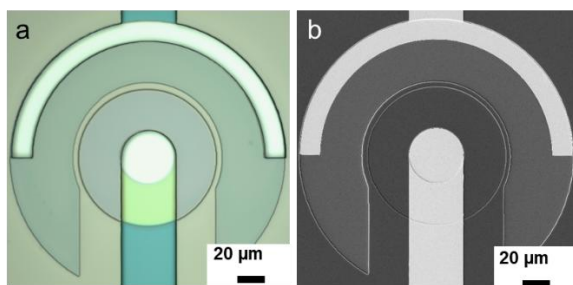

**Fig. S1:** a) Optical microscope and b) SEM image of single photovoltaic pixel with a diameter of 200  $\mu\text{m}$  with Au contacts on central  $n^+$  region and annular  $p^+$  region.

**Photovoltaic pixel characterization with visible light.** Initially, the photovoltaic properties of the pixels were characterized in a solar simulator for conventional testing of solar cells with visible light in AM 1.5G spectral conditions ( $100 \text{ mW cm}^{-2}$ ). Fig. S2 shows a schematic of the experimental setup.

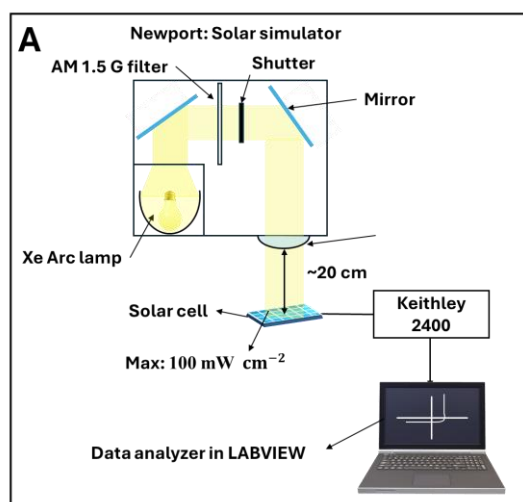

**Fig. S2:** Setup for testing solar cell pixels with AM 1.5G spectral conditions.

### Photovoltaic pixel characterization with NIR illumination.

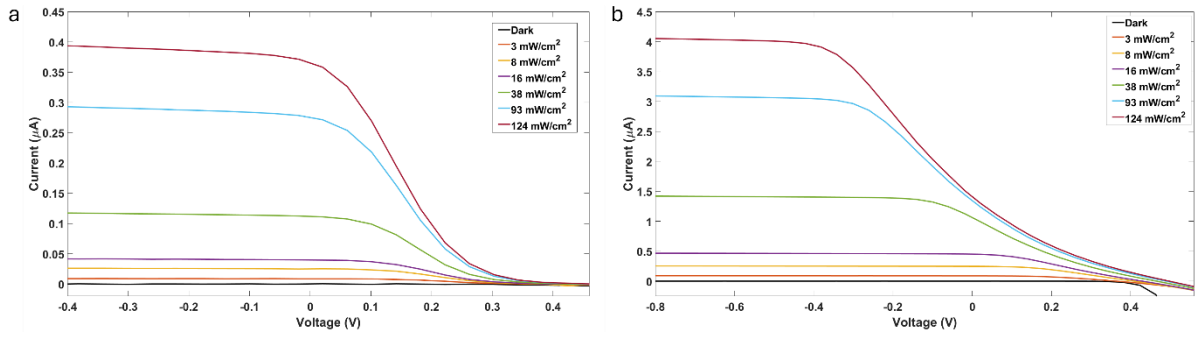

**Fig. S3:** I-V curves recorded for single photovoltaic pixels with diameter of a) 40 μm and b) 200 μm with Au contacts under 940 nm illumination with different intensities.

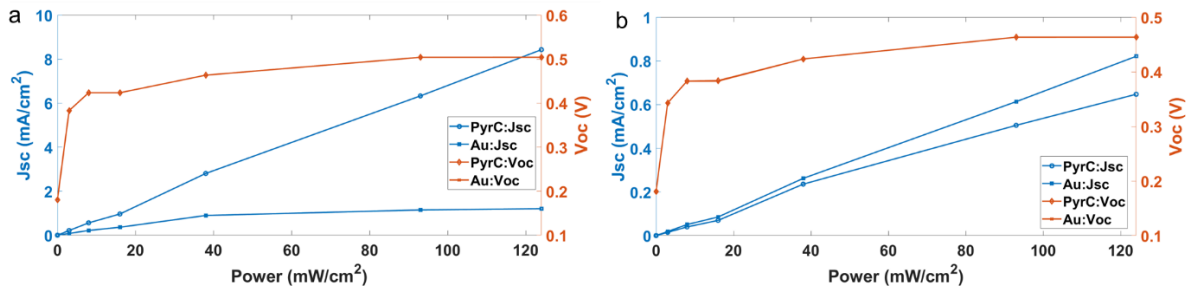

**Fig. S4:** Comparison of short circuit current density  $J_{sc}$  and open circuit voltage  $V_{oc}$  for a) 40 μm pixels and b) 200 μm pixels under 940 nm illumination with different intensities.

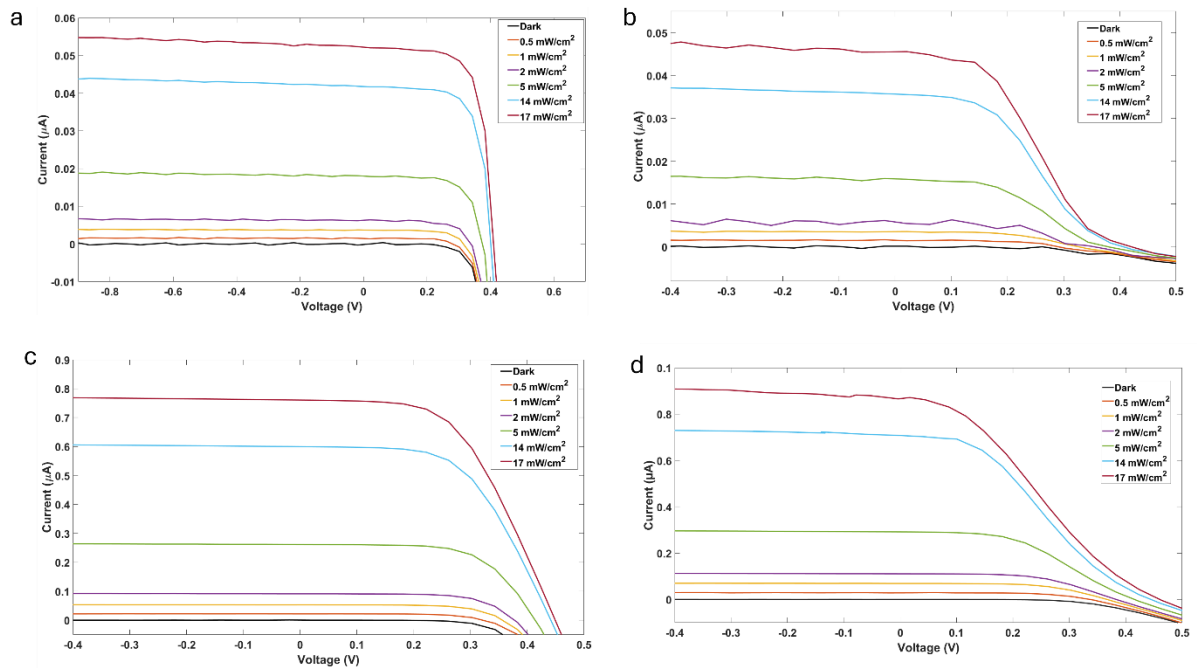

**Fig. S5:** I-V curves recorded for single photovoltaics pixels with diameter of a-b) 40 μm and c-d) 200 μm with a) and c) PyrC contacts and b) and d) Au contacts under 880 nm illumination with different intensities.

**Table S1.** Fill factor FF, short circuit current  $I_{sc}$  and open circuit voltage  $V_{oc}$  extracted from the recorded I-V curves under 880 nm NIR illumination at different intensities for pixels with PyrC and Au electrodes.

| Irradiance<br>880 nm<br>(mW cm <sup>-2</sup> ) | 40 $\mu$ m pixels |      |               |      |              |       | 200 $\mu$ m pixels |      |                     |      |              |       |
|------------------------------------------------|-------------------|------|---------------|------|--------------|-------|--------------------|------|---------------------|------|--------------|-------|
|                                                | FF                |      | $I_{sc}$ (nA) |      | $V_{oc}$ (V) |       | FF                 |      | $I_{sc}$ ( $\mu$ A) |      | $V_{oc}$ (V) |       |
|                                                | Au                | PyrC | Au            | PyrC | Au           | PyrC  | Au                 | PyrC | Au                  | PyrC | Au           | PyrC  |
| 0.5                                            | 0.51              | 0.76 | 1             | 1    | 0.295        | 0.262 | 0.61               | 0.69 | 0.03                | 0.02 | 0.332        | 0.362 |
| 1                                              | 0.38              | 0.68 | 3             | 3    | 0.336        | 0.302 | 0.55               | 0.68 | 0.06                | 0.05 | 0.382        | 0.383 |
| 2                                              | 0.38              | 0.64 | 5             | 6    | 0.342        | 0.343 | 0.54               | 0.65 | 0.11                | 0.09 | 0.382        | 0.392 |
| 5                                              | 0.30              | 0.65 | 15            | 17   | 0.382        | 0.382 | 0.43               | 0.61 | 0.29                | 0.26 | 0.423        | 0.410 |
| 14                                             | 0.27              | 0.72 | 33            | 41   | 0.416        | 0.410 | 0.31               | 0.58 | 0.72                | 0.59 | 0.467        | 0.455 |
| 17                                             | 0.22              | 0.68 | 45            | 52   | 0.423        | 0.423 | 0.29               | 0.51 | 0.87                | 0.76 | 0.495        | 0.463 |
